# Supplementary material for: Detection of targeted bacteria species on filtration membranes
Source: Royal Society of Chemistry journal article supplement (doi:10.1039/d1an00117e), 2021-01-01
Supplement: d1an00117e1.pdf [file d1an00117e1.pdf]

## Electronic Supplementary Information for

### Detection of targeted bacteria species on filtration membranes

Sebastian Schwaminger,\*<sup>a</sup> Marina E. Rottmueller,<sup>a</sup> Ramona Fischl,<sup>a</sup> Behnam Kalali <sup>b</sup> and Sonja Berensmeier <sup>a</sup>

<sup>a</sup>Bioseparation Engineering Group, Technical University of Munich, Boltzmannstraße 15, Garching, 85748, Germany

<sup>b</sup>Institute of Medical Microbiology, Immunology and Hygiene, Technical University of Munich, Munich, Germany

\*Author to whom correspondence should be addressed

Email: [s.schwaminger@tum.de](mailto:s.schwaminger@tum.de)

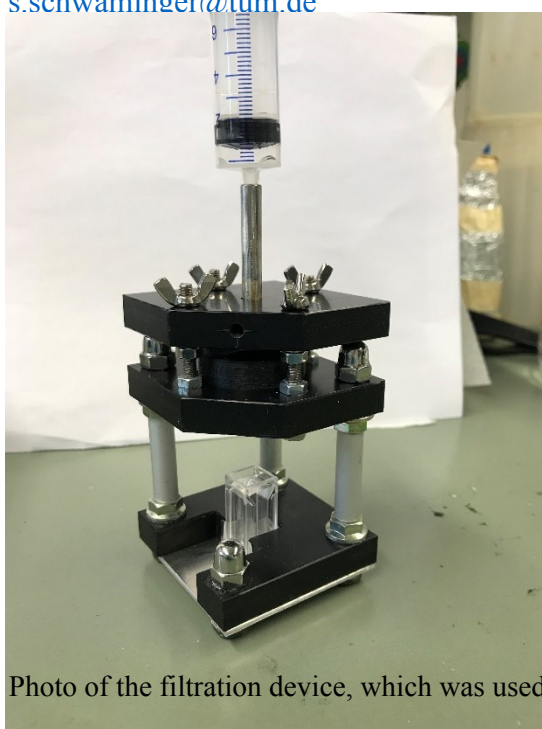

**Fig. S1** Photo of the filtration device, which was used for the experiments.

**Table S1** Overview of the used membranes for auto fluorescence, permeability and bacterial enrichment experiment.

| Abbreviation | Company | Model                         | Material                               | Pore size (µm) |
|--------------|---------|-------------------------------|----------------------------------------|----------------|
| Pall_F1      | Pall    | Supor 200                     | Polyethersulfone                       | 0.2            |
| Pall_F2      | Pall    | Supor 450                     | Polyethersulfone                       | 0.45           |
| Pall_F3      | Pall    | Metricel                      | GN-6 Mixed cellulose ester             | 0.45           |
| Pall_F4      | Pall    | Ultipor N                     | Nylon 6,6                              | 0.45           |
| WHAT_F1      | Whatman | Anodisc 25                    | Aluminium matrix, bonded to PP ring    | 0.2            |
| WHAT_F2      | Whatman | Nuclepore, Track Etched       | Polycarbonate, track-etched            | 0.4            |
| WHAT_F3      | Whatman | Nuclepore, Track Etched       | Polycarbonate, track-etched            | 0.2            |
| WHAT_F4      | Whatman | Cyclopore Black               | Polycarbonate                          | 0.2            |
| WHAT_F5      | Whatman | GF/C                          | Glass microfiber filter without binder |                |
| WHAT_F6      | Whatman | Nuclepore Track-Etch Membrane | Polycarbonate                          | 0.4            |

|         |           |                                             |                            |      |
|---------|-----------|---------------------------------------------|----------------------------|------|
| WHAT_F7 | Whatman   | Cyclopore Track Etched Membrane             | Polycarbonate Black        | 0.4  |
| NAL_F1  | Nalgene   | Membrane filter, gridded, CN, sterile, grey | Cellulose nitrate          | 0.45 |
| NAL_F2  | Nalgene   | Membrane filter, non-sterile CA             | Cellulose acetate          | 0.45 |
| SAR_F1  | Sartorius | Membrane filter with grid                   | Cellulose nitrate          | 0.2  |
| SAR_F2  | Sartorius | Typ 154                                     | Polyethersulfone           | 0.2  |
| SAR_F3  | Sartorius | Typ 154                                     | Polyethersulfone           | 0.45 |
| SAR_F4  | Sartorius | Typ 111                                     | Cellulose acetate          | 0.45 |
| SAR_F5  | Sartorius | Typ 111                                     | Cellulose acetate          | 0.2  |
| MIL_F1  | Millipore | Nitrocellulose                              | Nitrocellulose             | 0.45 |
| i3_F1   | i3        | Flexipor                                    | Aluminium oxide            | 0.2  |
| i3_F2   | i3        | Trackpor, gold-coated                       | Polycarbonate, gold-coated | 0.8  |

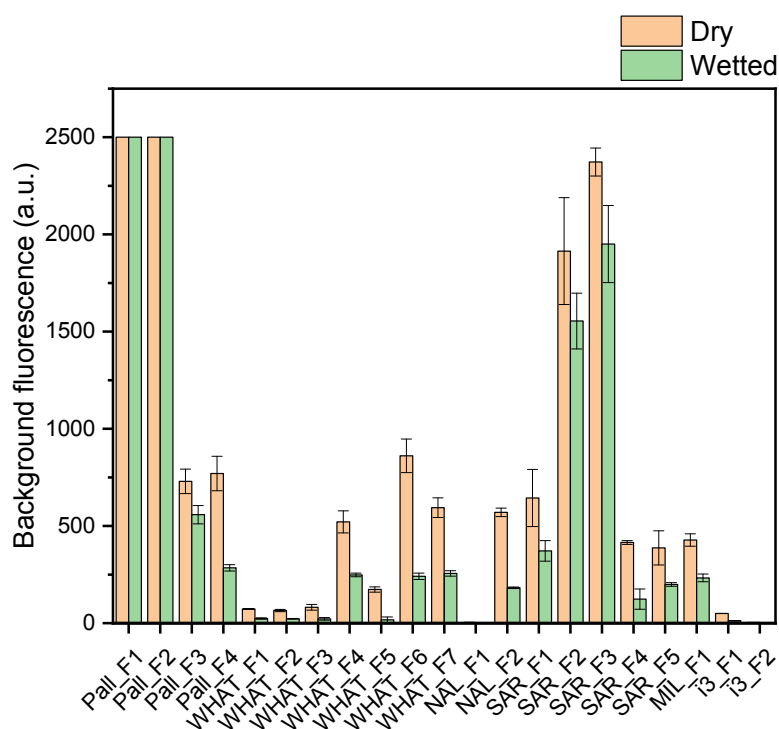

**Fig. S2** Autofluorescence studies of different membranes tested in dry and wetted state with an ESElog USB fluorescence detector by Qiagen. The fluorescence excitation was set to 480 nm and the fluorescence signal was detected at 520 nm.

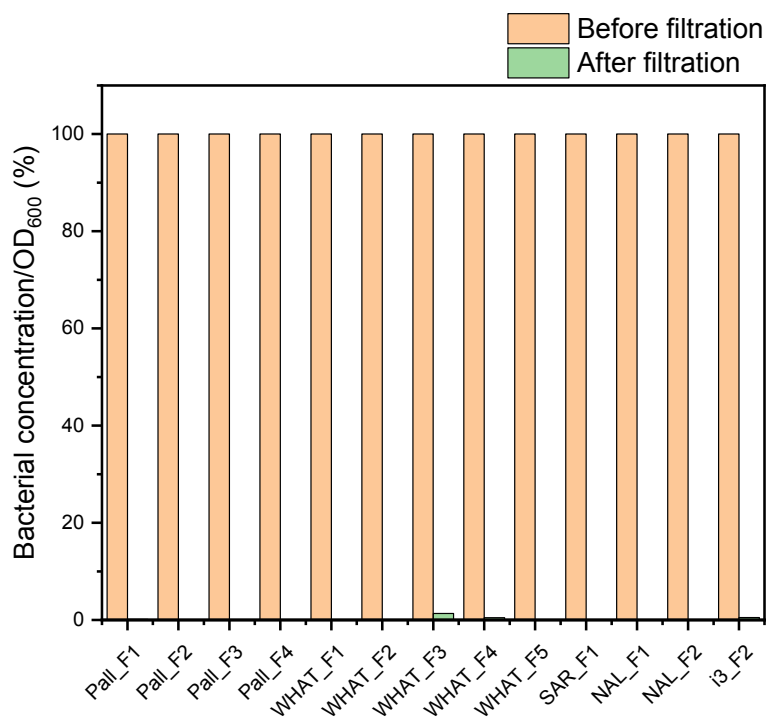

**Fig. S3** Permeation experiments of *E. coli* through different membrane filter. An  $OD_{600}$  of 0.2 was used in the feed and set to 100%.

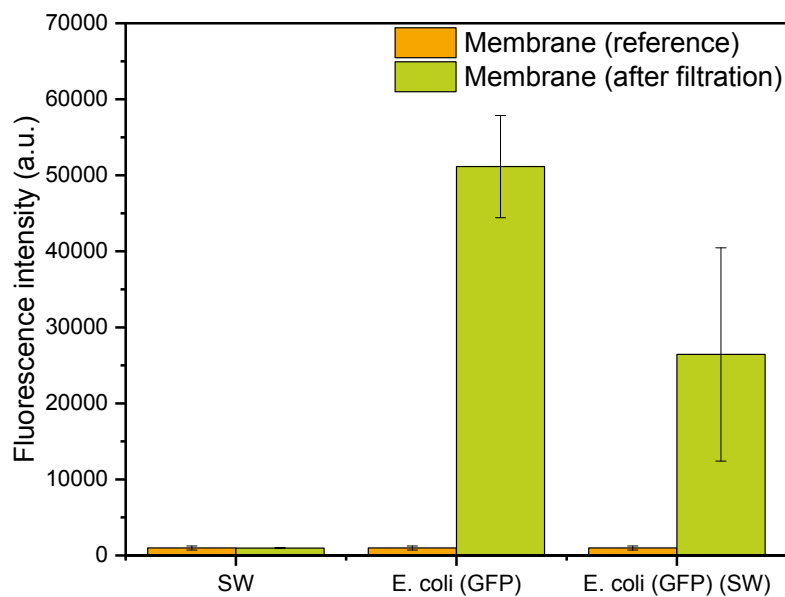

**Fig. S4** Filtration experiments of *E. coli* containing green fluorescent protein (GFP) through (WHAT\_F2) membrane filter. An  $OD_{600}$  of 0.004 was used for the filtration experiments. Therefore, bacteria were diluted with either PBS (pH 7.4) or surface water (SW) from Garching (pH 8). Filtration with PBS buffer is used as membrane (reference). All samples were measured in triplicates with a microplate reader (Tecan, Germany) with excitation at 480 and emission at 520 nm.
